# Supplementary material
Source: PubMed Central journal article supplement (PMC3070585)
Supplement: mmc1.pdf [file mmc1.pdf]

Supplemental Data

S1.

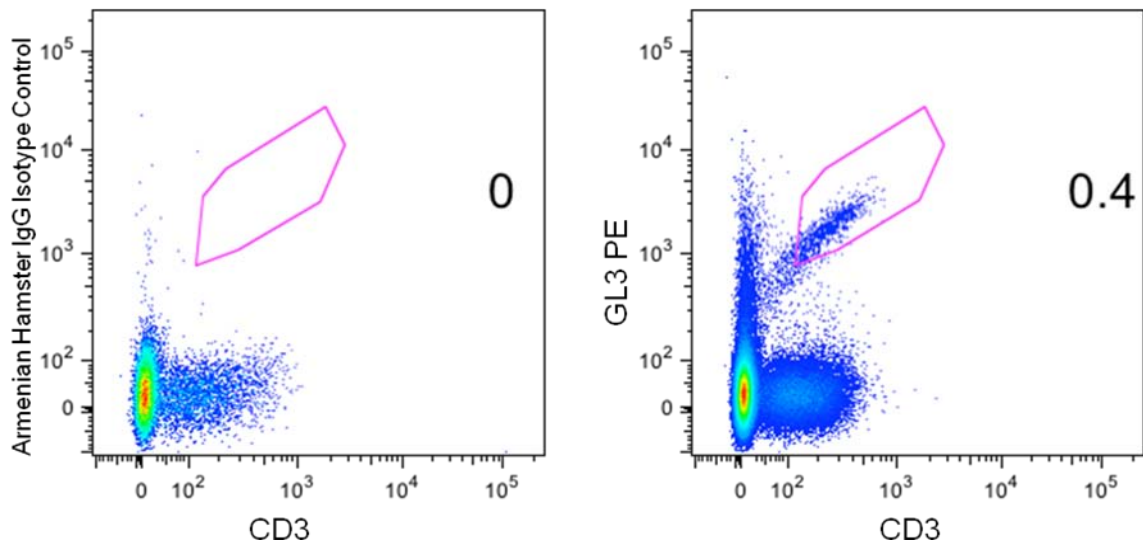

S1. Isotype control for GL3 antibody. As a control for non-specific GL3 staining, Armenian hamster IgG was used as an isotype control. A: Isotype control shows no GL3+/CD3+ cells. B) Naive mouse lung demonstrating 0.4% of CD3+ cells stain for GL3.
