# Supplementary material
Source: PubMed Central journal article supplement (PMC3070585)
Supplement: mmc3.pdf [file mmc3.pdf]

S3.

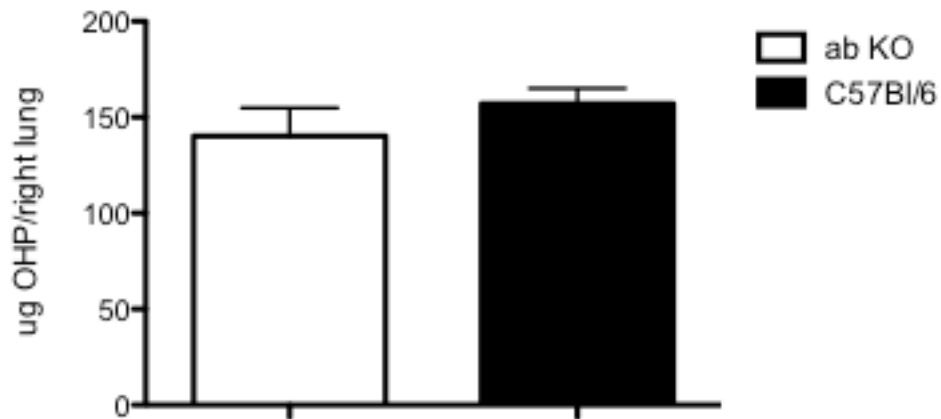

S3. Hydroxyproline analysis of TCR $\beta$ <sup>-/-</sup> mice compared to wild type controls. TCR $\beta$ <sup>-/-</sup> mice and wild type controls were instilled with bleomycin. 17 days later mice were sacrificed and lungs were collected for hydroxyproline analysis. Results show there were no detectable differences between wild type mice and knockout.
